# Supplementary material for: Cell-cycle-phase progression analysis identifies unique phenotypes of major prognostic and predictive significance in breast cancer
Source: PubMed Central journal article supplement (PMC2661794; doi:10.1038/sj.bjc.6604924), 2009-02-24

## Supplementary Figure 2

**A**

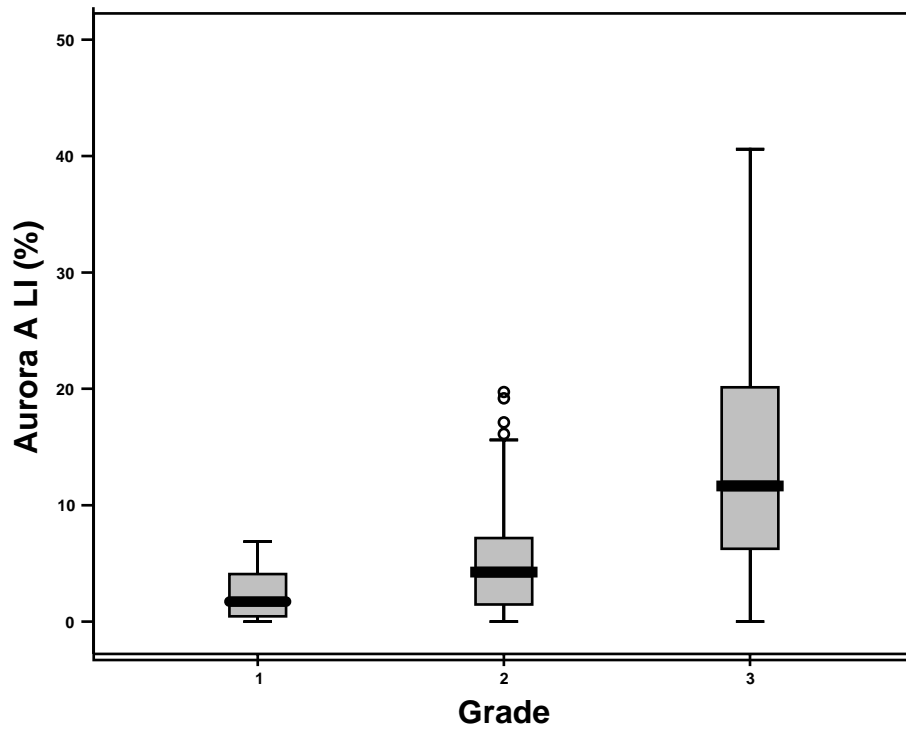

**B**

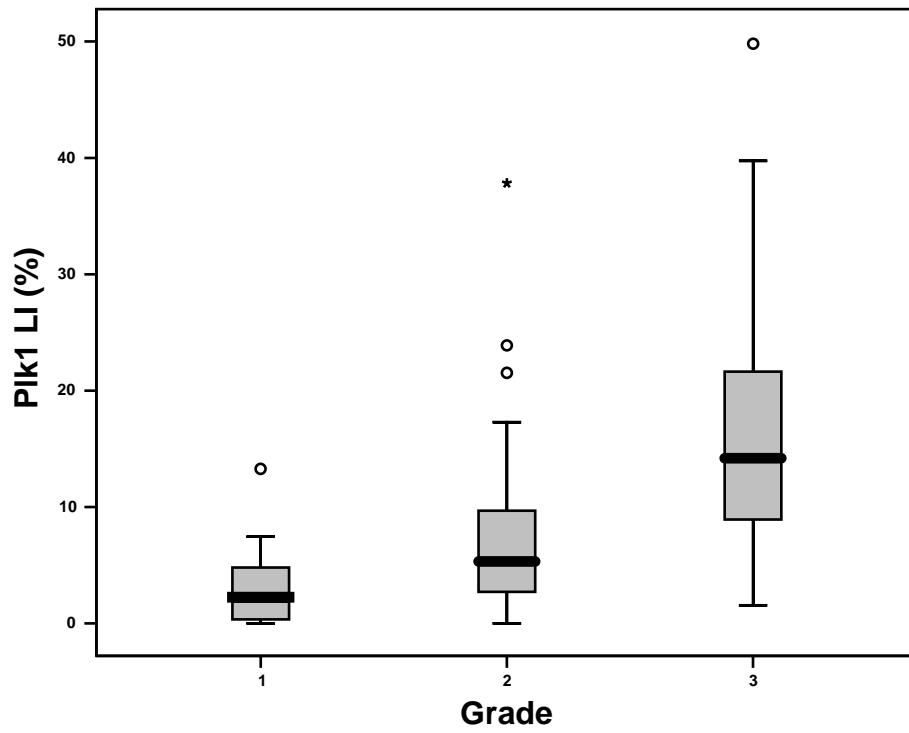

Supplement: 6604924x2.pdf [file 6604924x2.pdf]
